# Supplementary material for: Determinants of Marital Decision Despite Sickle Cell Status Awareness: A Mixed Method Study
Source: Research Square preprint supplement (doi:10.21203/rs.3.rs-5922377/v1), 2025-04-01
Supplement: Supplementary file 1 [file 272d931a2baabce6d85af010.docx]

**INFORMED CONSENT**

IRB research approval number: UI/EC/23/0012

TITLE: **DETERMINANTS OF MARITAL DECISION DESPITE SICKLE CELL STATUS AWARENESS: A MIXED-METHOD STUDY**

This study is being conducted by Mr. Adeniyi Adesola, Mr. Joshua Lawal, Mr. David Akoki, Miss Oluwatomisin Agboola, Miss Abigail Oyedokun and Miss Anuoluwapo Babawale, who are all students of the College of Medicine, University of Ibadan.

This research is being sponsored by the Duke Centre for Policy Impact in Global Health (CPIGH) in partnership with University of Ibadan Medical Students’ Association (UIMSA).

The purpose of the study is to access the awareness, knowledge and attitude of parents of children with sickle cell disease in the paediatrics haematology clinic of University College Hospital, Ibadan and Oni Memorial Children Hospital, Ibadan.

It is expected that this questionnaire will be completed within 10 to 12 minutes. Your participation will not cost you anything financially and will cause you no harm. You may choose to withdraw from the study at any point.

All information collected in this study will be treated as confidential and cannot be linked to you in any way.

----------------------------------------------------------------------------------------------------------------

I understand the description of this research and that my participation is voluntary. I know enough about the purpose, methods, risks and benefits of the research study to judge that I want to take part in it. I understand that I may freely stop being a part of this study

Yes

**DATA COLLECTION TOOLS**

**SOCIO-DEMOGRAPHICS**

1. AGE OF PARTICIPANT IN YEARS__________________

2. RELATIONSHIP TO PATIENT

[1] Mother [2] Father

3. EDUCATIONAL LEVEL [1] None [2] Primary [3] Secondary [4] Tertiary – Non University [5] Tertiary - University

4. RELIGION

[1] Christianity [2] Islam [3] Traditional [4] Others: please specify________________

5. EMPLOYMENT STATUS

[1] Unemployed [2] Self-employed [3] Employee [4] Retired [5] Student

6. ETHNICITY

[1] Yoruba [2] Igbo [3] Hausa [4] Others: please specify ____________________

**ATTITUDE**

7. DID YOU KNOW YOU HAD A SICKLE CELL TRAIT OR A SICKLE CELL DISEASE [AS or SS/SC] BEFORE MARRIAGE?

[1] YES [2] NO

8. DID YOU KNOW THE OTHER PARENT HAD A SICKLE CELL TRAIT OR A SICKLE CELL DISEASE [AS or SS/SC] BEFORE HAVING MARRIAGE?

[1] YES [2] NO

9. If YES to both, which of these factors influenced your decision to proceed with having a child? [tick as many that applies]

| S/N | FACTORS | TICK |
| --- | --- | --- |
| 1. | Religious reasons |  |
| 2. | I wanted to take the risk and hoping for the best |  |
| 3. | I was willing to bear the outcome |  |
| 4. | I did not know the implication |  |

Others [please mention]:

FIFI OWO SI IWADI

Namba igbaisẹ IRB: UI/EC/23/0012

**AKỌLE: DETERMINANTS OF MARITAL DECISION DESPITE SICKLE CELL STATUS AWARENESS: A MIXED-METHOD STUDY**

Awon ti o ko ipa ninu iwadi yi ni Mr. Adeniyi Adesola, Mr. Joshua Lawal, Mr. David Akoki, Miss Oluwatomisin Agboola, Miss Abigail Oyedokun ati Miss Anuoluwapo Babawale, ti gbogbo won jẹ akeko ni Ile Iwe Ile-Iwosan College of Medicine, Fasiti ti Ibadan.

Iwadi yi je asepe nipase iran lowo lati odo Duke Centre for Policy Impact in Global Health (CPIGH) pẹlu University of Ibadan Medical Students' Association (UIMSA).

Idi iwadi wa jẹ lati mo iru Imo, Oye ati iwaitoju awon obi ti omo won ni Asian Sickle Cell ni Ile-Iwosan Awon Omo ti University College Hospital, Ibadan ati Oni Memorial Children Hospital, Ibadan.

Iwe ibeere yi le gba o ni akoko miniti mewaa. Ikopa re ko ni na o ni owo ati pe ko ni ṣe yin laburu. O le ko lati maa ko ipa ninu iwadi yi ni igbakugba.

Gbogbo awon alaye ti agba fun iwadi yii ni a o fi bo ti a ko si le mo moo yin ni onakona

----------------------------------------------------------------------------------------------------------------

Mo mọ awon alaye iwadi yi ati pe iko pa mi ki shey ni tipatipa. Mo mọ nipa idi, anfani ati asise ti owa ninu iwadi yii lati fi mo boya mo fẹ ko ipa ninu re. Mo mọ pe mo le ko lati ma shey iwadi yi mo ni igbakugba.

Bẹẹni

**AWON OHUN IWADI**

**SOCIO-DEMOGRAPHICS.**

1. OJO ORI OLUKO IPA (NI IYE ODUN)_____________________

2. BI O SHEY JE SI OMO RE

[1] Iya [2] Baba

3. IPELE ẸKỌ TI OGAJU

[1] Ko si [2] Ipele Akọwọ [3] Ipele Kekeere [4] Ipele Giga - Ti ko ni Ile-Iwe Giga [5] Ipele Giga - Ile-Iwe

4. IGBAGBO

[1] Kristiani [2] Islam [3] Ẹsin Ibile [4] Miiran: jọwọ fi han_____________

5. IṢẸ TI OBI.

[1] Ko ni iṣẹ [2] Moni ise ara mi [3] won gba mi si ise [4] Moti fi eyin ti ni ibi ise [5] Akeko.

6. EYA

[1] Yoruba [2] Igbo [3] Hausa [4] Miiran: jọwọ fi han ______________

7. ṢE O MO WI PE O NI SICKLE CELL TRAIT TABI AISAN SICKLE CELL[AS tabi SS/SC] KII O TO SE IGBEYAWO?

[1] Bẹẹni [2] Bẹẹko

8. ṢE O MO PE OKO/AYA RE NI SICKLE CELL TRAIT TABI AISAN SICKLE CELL [AS tabi SS/SC] KI O TO SHEY IGBEYAWỌ?

[1] Bẹẹni [2] Bẹẹko

9. Ti Bẹẹni fun meji, ẹwo ninu awon iru idi yi ni o jeki osi tẹsiwaju ninu igbeyawo? [ole mu ju idahun kan lo]:

| S/N | Idi |  |
| --- | --- | --- |
| 1. | Mo tesiwaju tori esin mi |  |
| 2. | Mo pi inu lati shey igbeyawo mi be |  |
| 3. | Mo fi ara mo ohun Kohun tiii yo ba shele |  |
| 4. | N ko mo awon iru wahala ati ijamba ti o wa ni ibe. |  |

Omiran__________________________________________
